# Supplementary material for: Discovery of a new stable polymorph of 4-(3-ethynylphenylamino)-6,7-bis(2-methoxyethoxy)quinazolinium methanesulfonate using near-infrared spectroscopy to monitor form change kinetics †
Source: Royal Society of Chemistry journal article supplement (doi:10.1039/b003531i), 2000-01-01
Supplement: b003531i.doc [file b003531i.doc]

Supplementary data

Discovery of a new stable polymorph of *N*-(3-ethynylphenylamino)-6,7-bis(2-methoxyethoxy)-4-quinazolinium methanesulfonate using near-infrared spectroscopy to monitor form change kinetics

# Timothy Norris* and Dinos Santafianos

*Pfizer Global Research and Development Laboratories, Groton, Connecticut, 06340, USA*

# Spectral diagrams relating to the polymorph conversion kinetics

data file ba100497.mat

data file bc160397.mat

data file hb240397

data file hb260397.mat

NIR spectra of various forms of compound **5** as slurries in propan-2-ol

ba100497.mat is a collection of 282 spectra taken at 5 minute intervals during the conversion of polymorph B into polymorph A

bc160397.mat is a collection of 298 spectra taken at 5 minute intervals during the conversion of polymorph B into polymorph C.

hb240397.mat is a collection of 253 spectra taken at 5 minute intervals during the conversion of salt **5** monohydrate into polymorph B.

hb260397.mat is a collection of 123 spectra taken at 5 minute intervals during the conversion of salt **5** monohydrate into polymorph B.

If the corresponding data files are loaded into MATLAB for windows version 4.2c.1, the spectra can be run through to give a speeded up impression of the kinetic transformation as observed in real time.
